# Supplementary material for: Limb myology and muscle architecture of the Indian rhinoceros Rhinoceros unicornis and the white rhinoceros Ceratotherium simum (Mammalia: Rhinocerotidae)
Source: PeerJ. 2021 May 11;9:e11314. doi: 10.7717/peerj.11314 (PMC8121076; doi:10.7717/peerj.11314)
Supplement: Supplemental Information 3 [file peerj-09-11314-s003.xlsx]

## Sheet: Rhinoceros muscular data
				Adult Rhinoceros unicornis										Adult Ceratotherium simum										Neonate Rhinoceros unicornis										Neonate Ceratotherium simum Most tendon data are unavailable
N°	Abbreviation	Muscle name	Limb	Average fascicle length (cm)	Volume (cm^3)	PCSA (cm^2)	Maximal isometric force (N)	Normalized average fascicle length (%)	Normalized maximal isometric force (%)	Muscle belly length (cm)	Pennation (°)	Tendon mass (g)	Tendon length (mm)	Average fascicle length (cm)	Volume (cm^3)	PCSA (cm^2)	Maximal isometric force (N)	Normalized average fascicle length (%)	Normalized maximal isometric force (%)	Muscle belly length (cm)	Pennation (°)	Tendon mass (g)	Tendon length (cm)	Average fascicle length (cm)	Volume (cm^3)	PCSA (cm^2)	Maximal isometric force (N)	Normalized average fascicle length (%)	Normalized maximal isometric force (%)	Muscle belly length (cm)	Pennation (°)	Tendon mass (g)	Tendon length (cm)	Average fascicle length (cm)	Volume (cm^3)	PCSA (cm^2)	Maximal isometric force (N)	Normalized average fascicle length (%)	Normalized maximal isometric force (%)	Muscle belly length (cm)	Pennation (°)	Tendon mass (g)	Tendon length (cm)
1	OT	Omotransversarius	Fore	51.2	3396.23	66.3325	1989.98	266.806	9.82333	63				43.0333	1215.09	28.2361	847.084	226.134	3.99764	56.5				12.922	45.8	3.54814	106.444	175.332	25.2339	27.5				20.9	88.3	4.22632	126.79	214.8	27.499	21
2	BC	Brachiocephalicus	Fore	68.8	1695.28	24.6407	739.222	358.52	3.6491	71				52.8	1774.53	33.6085	1008.25	277.457	4.75825	56				16.164	113	6.99201	209.76	219.322	49.7263	43				24	92.3	3.73681	112.104	246.66	24.3139	28	13.8
3	PC	Pectorales	Fore	32.35	11351.9	350.008	10500.2	168.577	51.8334	0				35.2046	11805.3	335.334	10060	184.995	47.4762	0				9.901	84	8.48018	254.405	134.342	60.3099	19.4				15.51	271.142	17.4494	523.481	159.404	113.536	19.129	3.50301
4	PCD	Pectoralis descendens	Fore	55.22	2124.53	38.4739	1154.22	287.754	5.69768	70.6				29.1111	2906.41	99.8387	2995.16	152.975	14.1351	45														14	105	7.50202	225.061	143.885	48.8127	17
5	PCT	Pectoralis transversus	Fore	22.55	4061.32	180.103	5403.09	117.509	26.6718	48				31.875	1974.53	61.946	1858.38	167.499	8.77024	62														4.2	39.6	8.60809	258.243	43.1655	56.0095	14	24
6	PAS	Pectoralis ascendens + subclavius	Fore	30.65	5166.04	166.474	4994.23	159.719	24.6535	75	9			37.2833	6924.34	185.722	5572	195.919	26.29	70														20.3	127	6.23339	187.002	208.633	40.5582	22.5
7	SV	Serrati ventrales	Fore	7.64	10347.9	1047.11	31413.3	39.8124	155.069	0																								18.2	168.868	9.27846	278.354	187.05	60.3712	24
8	SVC	Serrati ventrales cervicis	Fore	9.5	6848.49	575.731	17271.9	49.505	85.2613	54.5	37			16.46	7163 (extrapolated from R. unicornis)	372.263	11167.9	86.495	52.7046		31.2
9	SVT	Serrati ventrales thoracis	Fore	4	3499.43	629.321	18879.6	20.8442	93.1975	60	44			10.38	3660 (extrapolated from R. unicornis)	303.325	9099.74	54.5455	42.9444		30.6667													0
10	TP	Trapezius	Fore	7.3	1760.38	208.84	6265.2	38.0406	30.9276	55	30			6.47143	606.981	75.397	2261.91	34.0065	10.6746	32.5	36.5			5.33	53.8	10.0888	302.666	72.3202	71.7506	23.2				4.9	119	23.7953	713.858	50.3597	154.826	16.857	11.0653
10.1	TPC	Trapezius cervicis	Fore																															7.16	48.8774	6.82645	204.793	73.5868	44.417	9.5
10.2	TPT	Trapezius thoracis	Fore																															3.32	69.9245	19.938	598.139	34.1213	129.728	22	18.8
11	RHB	Rhomboideus	Fore											30.5333	1192.83	39.0665	1171.99	160.448	5.53099	41				2.594	35.1	13.0179	390.537	35.1967	92.5815	16.6	15.8			7.7	170	18.8461	565.383	79.1367	122.624	25.5	31.6
12	LD	Latissimus dorsi	Fore	30.15	7616.04	248.632	7458.96	157.113	36.8205	48	10	62	7	13.2474	7326.98	437.814	13134.4	69.6131	61.9852	73	21.4			11.7375	109.434	9.32345	279.703	159.261	66.3071	18.7		Missing	12.1	16.95	416	23.9634	718.903	174.203	155.921	29.992	6.91849
13	SSP	Supraspinatus	Fore	7.21	4373.59	511.031	15330.9	37.5717	75.6798	50.5	32.6			7.20667	2367.92	271.111	8133.33	37.87	38.3836	64	34.4			5.9025	71.7	10.1642	304.927	80.0882	72.2867	20.1	33.2			5.2	156	25.8722	776.167	53.443	168.34	21	30.6
14	ISP	Infraspinatus	Fore	6.7	3557.55	406.752	12202.6	34.914	60.2368	55	40	145	5	7.27	3199.43	380.742	11422.3	38.2028	53.905	66.7	30.1			3.366	72.8	20.8195	624.586	45.6716	148.066	11.5	15.8	3.6	4.8	5.3	141	24.466	733.979	54.4707	159.19	23	22.8
15	SSC	Subscapularis	Fore	7.1	2269.81	284.847	8545.42	36.9984	42.1837	33	27			7.31818	1444.91	164.959	4948.77	38.456	23.3547	40	33.3333			3.738	43	11.257	337.711	50.7191	80.0586	11.1	12			3.66	36.7	9.60892	288.267	37.6156	62.5214	4.5	16.6
16	DL	Deltoideus	Fore	14.19	2700.57	169.776	5093.27	73.9448	25.1425	0				14.6285	2265.09	137.139	4114.16	76.8705	19.4159					10.808	151.132	13.772	413.161	146.649	97.9449					6.56	96.4	13.8431	415.293	67.4203	90.0716	19	19.6
17	DLA	Deltoideus acromialis	Fore	10.33	989.057	86.3469	2590.41	53.8301	12.7873	30.3	25.6			7.3125	614.151	79.2301	2376.9	38.4262	11.2173	54.5	19.375			14.086	86.2264	6.12143	183.643	191.126	43.5348	22.1
18	DLS	Deltoideus scapularis	Fore	16.42	1711.51	92.3718	2771.16	85.5654	13.6796	46	27.6			17.35	1650.94	81.777	2453.31	91.1718	11.5779	54.5	30.75			6.454	64.9057	9.24343	277.303	87.5712	65.7381	14.4	23.2
19	TRS	Teres major	Fore	17.53	2186.04	110.735	3322.05	91.3497	16.399	50	27.8	46	7	46	539.434	11.7268	351.805	241.724	1.66027	46				3.4975	32.8	9.04973	271.492	47.4559	64.3605	15.5	15.4			6.3	16.8	2.61983	78.5949	64.7482	17.0462	16	11.6
20	CB	Coracobrachialis	Fore	10.23	582.453	55.1909	1655.73	53.309	8.17335	22	14.2	24	12	21.5	1436.6	66.8188	2004.56	112.98	9.46013	36														3.16	11.5	3.45751	103.725	32.4769	22.4966	7	17.6
21	BB	Biceps brachi	Fore	2.41	1729.24	544.799	16344	12.5586	80.6805	30	40.6	360 | 78	9.0 | 12.0	6.4	1918.87	268.555	8056.65	33.6311	38.0217	35	26.4	523	17	2.004	43.4	20.4995	614.985	27.1913	145.79	14.3	18.8	10.8	8.1	2.14	79.1	31.2138	936.413	21.9938	203.096	20	32.4	11.11	7
22	BR	Brachialis	Fore											8.24	299.245	36.3162	1089.49	43.3001	5.1416	34				9.154	30	3.27726	98.3177	124.206	23.3074	13.9				14.9	92.7	6.22198	186.659	153.135	40.484	21
23	TLo	Triceps caput longum	Fore	38	13298.1	319.696	9590.87	198.02	47.3444	74.5	24			29.0982	13936	478.931	14367.9	152.907	67.8065	87				12.666	84.3	6.65874	199.762	171.859	47.3561	29		0.8	3.9	16.95	416.151	24.548	736.44	174.203	159.724	27	13.2
23.1	TLo Accessory	Triceps caput longum - accesorius	Fore																															19.8	21.1604	1.06871	32.0612	203.494	6.95365	26
24	TLa	Triceps caput laterale	Fore	27.11	3023.59	111.53	3345.91	141.271	16.5168	40.5				23.3125	2607.17	111.836	3355.07	122.504	15.8336	45.5				10.06	74.9	7.44589	223.377	136.499	52.9542	13.9				16.8	134.028	7.97788	239.336	172.662	51.9089	20
25	TM	Triceps caput mediale	Fore	19.06	112.264	5.81427	174.428	99.3226	0.861048	32	9.2			15	728.113	48.5409	1456.23	78.8229	6.87236	39				13.364	78.7	5.8874	176.622	181.33	41.8704	18.6				8.8	65.4	7.42925	222.877	90.4419	48.3392	15
25.1	ANC	Anconeus	Fore																					5.987	13.3962	2.23768	67.1303	81.2347	15.9141	12.4		0.4	3
26	TFA	Tensor fasciae antebrachiae	Fore	27.61	409.811	14.5799	437.399	143.877	2.15918	45	10.8			10.9091	1099.81	83.6786	2510.36	57.3258	11.8471	46	33.9
26.1	BRA	Brachioradialis	Fore	35.8	1854.72	51.8077	1554.23	186.555	7.67232	51				39.2	114.245	2.91442	87.4326	205.991	0.41262	46				9.99	52.8302	5.28831	158.649	135.55	37.6098	17.1
27	ECR	Extensor carpi radialis	Fore	17.6				91.7144		41	25	112	27	23.25	2325.28	91.5071	2745.21	122.176	12.9555	52.5	18.2	13.8	21.5	7.74	87.2	11.2622	337.867	105.02	80.0957	18.6		5 | 1.8 (both distal)	11.5 | 9.6 (both distal)	9.2	137	13.8018	414.055	94.5529	89.803	30.5	22.4	4.9	11
28	UL	Ulnaris lateralis	Fore	5.65	1964.15	322.324	9669.71	29.4424	47.7336	48	22	91	10	4.53	1418.3	273.037	8191.11	23.8045	38.6563	37.5	29.3	86.8	10.5	4.82	51.7	10.6315	318.946	65.4003	75.6101	14.2	7.6	3	3.6	3.6	62.8	15.9047	477.142	36.999	103.486	20.5	24.2	2.04	5.5
28.1	ECO	Extensor carpi obliquus	Fore	5.6	217	35	1045	29.1819	5.16	27	26	90	23	10	26	2	72	52.5486	0.34	31.2	16.6													2.1	15	7	201	21.5827	43.7	12	23.6
29	EDC	Extensor digitorum communis	Fore	7.25	877.925	105.91	3177.31	37.7801	15.6845	39	29	299	26	14.85	967.925	63.2714	1898.14	78.0347	8.95789	46	13.9	205.8	34	3.822	30.8	7.89892	236.968	51.8589	56.1761	14	11	11.4	16.5	10.62	49.7	4.67878	140.364	109.147	30.443	18
30	EDLaF	Extensor digitorum lateralis (Forelimb)	Fore	5.75	596.415	87.9633	2638.9	29.9635	13.0267	33.5	32	84	35	9.96	529.245	53.1371	1594.11	52.3384	7.52309	41		81	33	2.63	20.8	7.56263	226.879	35.6852	53.7844	13.9	16.6	5	13.1	2.96	26.2	7.90287	237.086	30.4214	51.4208	15.5	26.8
31	FCR	Flexor carpi radialis	Fore	22.04	594.528	26.975	809.249	114.851	3.99478	35		16.5	15.3	23.8571	453.774	19.0205	570.613	125.366	2.69289	37		14.4	17
32	FCU	Flexor carpi ulnaris	Fore											1.96364	188.302	82	2460.74	10.3186	11.613	40.6	31.2	6	6.4	1.042	13.6	12.6929	380.786	14.1384	90.2701	18.8	13.2	2.2	9.7	1.56	28.6	17.6546	529.639	16.0329	114.872	15	15.8
33	FDSF	Flexor digitorum superficialis (Forelimb)	Fore	4.48	572.358	104.14	3124.19	23.3455	15.4223	47.3	35.4	111	22.5	3.86	402.453	91.3658	2740.97	20.2838	12.9355	32	28.8	395	3.5	8.728	17.5	2.01045	60.3134	118.426	14.298	15.9		2.6	8.2	3.34	45.3	12.9023	387.069	34.3268	83.9501	15	18	21.09	11.5
34	FDPF	Flexor digitorum profundus (Forelimb)	Fore																					1.67	46	22.0742	662.225	22.6594	156.989	13.2	36.8	1.4 | 13.6	1.5 | 8.3	12.52	16.2	1.29453	38.836	128.674	8.42301	29		21.09	11.5
34.1	FDPF - U	Flexor digitorum profundus - ulnar	Fore	3.3	473.585	123.013	3690.38	17.1965	18.2172	71	31	1329	46	4.48	853.774	145.989	4379.66	23.5418	20.6689	38	40	335.2	2.5
34.2	FDPH - H	Flexor digitorum profundus - humeral	Fore	6.75	1534.91	179.188	5375.65	35.1746	31.2238	40	38	373	22	32.6	273.585	8.39218	251.765	171.308	1.18815	38		335.2	2.2
35	GSP	Gluteus superficialis	Hind	26	13443.4	441.332	13239.9	184.266	65.3578	74	31.4	206	13	15.4	1614.15	100.019	3000.56	69.2758	14.1605	66	17.4			11.204	183.962	16.2515	487.544	148.594	115.578	22.9	8.2	6	13.9	9.04	53.2	5.73333	172	99.6692	37.3045	21.5	13.2
36	GMD	Gluteus medialis	Hind	19.7	7783.02	346.871	10406.1	139.617	51.3689	63	28.6	26	3.5	24	5444.53	216.236	6487.09	107.962	30.6145	70	17.6			6.42	44.2	6.87709	206.313	85.1459	48.909	13.2				9.88	192	17.9917	539.752	108.931	117.065	23	22.2
37	GPF	Gluteus profundus	Hind	3.75	649.057	147.734	4432.02	26.5769	21.8783	23.5	31.4			7.2	837	107.581	3227.45	32.3887	15.2313	30	22.2													10.26	36.8	3.59153	107.746	113.12	23.3686	18	0
38	OG	Obturator et gemelli	Hind	7.5	1489.62	166.195	4985.85	53.1538	24.6122	23	33.2			14.6667	1729.06	117.89	3536.71	65.9769	16.6908	36														5.32	6.2	1.16506	34.9518	58.6549	7.58058	9	0
39	TFL	Tensor fasciae latae	Hind	8.35	5660.38	455.352	13660.6	59.1779	67.4341	46	47.8	239	28	17.0268	3750	213.764	6412.91	76.5939	30.2644	44	13.9	110 | 185	13.0 | 27.5	4.768	74.7	15.1645	454.935	63.2361	107.848	13.4	14.6			9.88	135	12.5796	377.388	108.931	81.8505	16.5	23.4
40	GB	Gluteobiceps	Hind											58.8128	16643.4	282.989	8489.68	264.565	40.0653	0		107.8	11	13.048	239.434	18.3498	550.495	173.05	130.502			3.6	5.7	17.76	453.981	23.0526	691.579	195.81	149.994	34	25.6
40.1	GB caudal	Gluteobiceps - caudal head	Hind	29.65	8679.25	232.544	6976.31	210.135	34.4379	63	37.4	429	11	51.6	8421.13	163.2	4896.01	232.119	23.1057	72				10.462	24.717	2.36255	70.8765	138.753	16.8021	22.2
40.2	GB cranial	Gluteobiceps - cranial head	Hind											66.2	8222.26	124.203	3726.1	297.796	17.5846	81		107.8	11	13.346	214.717	16.0885	482.655	177.003	114.419	23.9		3.6	5.7
41	SM	Semimembranosus	Hind	13.25	5094.34	378.04	11341.2	93.905	55.9848	99	10.5			41.4	4182.45	101.025	3030.76	186.235	14.3031	48				12.31	76	6.17691	185.307	163.263	43.9294	24.2				24.02	110.849	4.61486	138.446	264.829	30.0271	37	0
42	ST	Semitendinosus	Hind	41.57	7059.43	166.782	5003.45	294.614	24.6991					42.1	4258.49	101.152	3034.55	189.384	14.321	90				9.586	69.1	7.2039	216.117	127.135	51.2332	22.9				16.68	182.953	10.2717	308.152	183.903	66.8341	35	20.5
42.1	ST 1	Semitendinosus - 1	Hind	59.5	1304.72	21.928	657.84	421.687	3.24737	87
42.2	ST 2.1	Semitendinosus - 2 pennate	Hind	26.95	2452.83	77.8502	2335.51	190.999	11.529	64	31.2	68	4
42.3	ST 2.2	Semitendinosus - 2 non-pennate	Hind	45.35	3301.89	72.809	2184.27	321.403	10.7824	65		25	5.5
43	IL	Iliacus	Hind	11.3	814.151	63.0153	1890.46	80.085	9.33207	21.5	29	184	28	23.56	1730	73.4055	2202.17	105.983	10.3927	43				7.77	177.358	21.0733	632.198	103.05	149.87	25.5	22.6			7	20.8	2.88706	86.6119	77.1775	18.785	17	13.6
44	PMJ	Psoas major	Hind	13.75	278.302	19.9249	597.748	97.4486	2.95073	26.5	10.125			21	2417.55	115.121	3453.64	94.4669	16.2987	29														9.96	97.1	9.2044	276.132	109.813	59.8894	23	19.2
45	PMN	Psoas minor	Hind											9.8	641.887	65.4986	1964.96	44.0846	9.27323	15				5.418	60.9	11.0491	331.472	71.8568	78.5796	26.1	10.8			10.24	58.1	5.26927	158.078	112.9	34.285	19	21.8
46	RF	Rectus femoris	Hind	12.2	5660.38	396.018	11880.5	86.4635	58.6472	53	31.4			29.25	3066.98	104.854	3145.62	131.579	14.8451	58				5.868	88.9	12.5257	375.772	77.8249	89.0813	21.9	34.2	1.2	2.6	8.24	125	13.8034	414.103	90.849	89.8135	22.5	24.6
47	VL	Vastus lateralis	Hind	26.2	5660.38	179.53	5385.9	185.684	26.587	52	33.8			32.2	3780	117.344	3520.33	144.849	16.6135	51				8.858	104.906	11.8197	354.59	117.48	84.06	18.4	3.6			12.9	142	10.4031	312.092	142.227	67.6886	1.8	19.2
48	VM	Vastus medialis	Hind	23.95	3018.87	104.989	3149.66	169.738	15.548	43	33.6	82	21	26.7	2544.34	95.2936	2858.81	120.108	13.4916	45.5				9.984	82.3	8.20569	246.171	132.414	58.3578	17.9	5.2			8.34	93.9	10.5961	317.884	91.9515	68.9449	17	19.8
49	SRT	Sartorius	Hind	14.27	525.943	33.3553	1000.66	101.134	4.93966		25.51			45.4	680	14.978	449.339	204.229	2.12056	66				14.362	27.2	1.89178	56.7535	190.477	13.4541	33.1				10.725	28.2	2.48461	74.5383	118.247	16.1664	24	19.2
49.1	SRT caudal	Sartorius - caudal head	Hind	14.95	427.358	26.195	785.85	105.953	3.87928	29	23.6	1	3.5
49.2	SRT cranial	Sartorius - cranial head	Hind	11.3	98.5849	7.38247	221.474	80.085	1.09329	34.5	32.2	29	13
50	GRC	Gracilis	Hind	13.35	3207.55	206.379	6191.36	94.6137	30.5631	41	30.8	258	27	30.8	2887.36	93.7454	2812.36	138.552	13.2724	64				14.106	155.094	10.9949	329.848	187.082	78.1944	33.7				5.52	90.2	15.7702	473.107	60.86	102.611	20.5	15.2
51	PTN	Pectineus	Hind	8.03	2124.53	252.826	7584.77	56.91	37.4415		37.12			11.125	125.094	11.2444	337.333	50.045	1.59197	20.5				5.534	50.6	8.81768	264.531	73.3952	62.7102	9.3	15.2			6.64	58	8.2172	246.516	73.2084	53.4661	15	19.8
51.1	PTN - large	Pectineus - large head	Hind	5.85	1698.11	233.038	6991.15	41.46	34.5112	27	36.6
51.2	PTN - small	Pectineus - small head	Hind	16.7	426.415	19.7873	593.619	118.356	2.93035	23	39.2	3	3.5
52	ADD	Adductores	Hind	34.87	4245.28	121.738	3652.15	247.13	18.0285	50.5		5.5	65	45.3	2170	47.9654	1438.96	203.779	6.79088	68				7.92	194.151	24.5204	735.613	105.04	174.386	36		7.6	7.6	10.4	122	11.056	331.68	114.664	71.9369	24.5	19.2
53	GC	Gastrocnemius	Hind	6.85	1838.68	222.203	6666.08	48.5471	32.9065		34.09			4.32716	1105	200.574	6017.21	19.4654	28.397					3.32	46.2	13.4295	402.886	44.0318	95.5091					4.54	58.6	12.5079	375.236	50.0551	81.3837	13	14.2
54	GCL	Gastrocnemius caput laterale	Hind	5	892.453	133.888	4016.63	35.4359	19.8277	43	41.4	104	22.5	2.64	566	166.626	4998.79	11.8758	23.5908	31	39	158.8	15	3.87	23.4	5.81134	174.34	51.3263	41.3295	12.3	16	2	7.2
55	GCM	Gastrocnemius caput mediale	Hind	8.6	946.226	97.8592	2935.78	60.9497	14.4922	33.5	27.2	25 | 106	4.5 | 18.0	6.1	539	70.1532	2104.6	27.4404	9.93222	31	37.4	158.8	15	2.75	22.8	8.01901	240.57	36.4721	57.0301	17.5	15	6.6	4.5
56	PP	Popliteus	Hind	3.9	115.094	26.9179	807.537	27.64	3.98633	17	24.2	23	10																					3.38	10.3	2.89136	86.7408	37.2657	18.8129	7.5	17.8
57	TCR	Tibialis cranialis	Hind	14.65	872.642	58.4214	1752.64	103.827	8.65176	14	11.25	34	30.5	14.6	363.585	24.1633	724.9	65.677	3.42102	27.5	14	9.8	15	9.656	24.9	2.57929	77.3788	128.064	18.3436	16.5		0.8 | 1.4	4.0 | 8.0	6.02	19.9	2.92159	87.6476	66.3727	19.0096	10.5	27.6667
58	EDLo	Extensor digitorum longus	Hind	8.97	1293.4	117.061	3511.82	63.5719	17.3358		35.76			19.2222	1200	56.5574	1696.72	86.4697	8.00733	44	25.2	120.6 | 42.8	9.0 | 23.0	5.322	38.1	7.05694	211.708	70.5836	50.1881					5.72	66.1	10.4091	312.272	63.065	67.7278	20	25.8	2.96	5.5
58.1	EDLo - M	Extensor digitorum longus - medial belly	Hind	4.05	410.377	74.1064	2223.19	28.703	10.9746	24.5	43	39	19																	16.5	9.8	4.6	9
58.2	EDLo - L	Extensor digitorum longus - lateral belly	Hind	11.25	883.019	66.2718	1988.15	79.7307	9.81433	32	32.4	57 | 74	22.5 | 11.0																	14.5		1.2 | 3.4	60 | 70
59	EDLaH	Extensor digitorum lateralis (Hindlimb)	Hind	5.8	210.377	31.2851	938.552	41.1056	4.63307	29	30.4	50	34	10.5	91.3	8.27154	248.146	47.2335	1.17108	29	18	17	28											3.38	6.57	1.79148	53.7444	37.2657	11.6565	11.5	22.75
60	FD	Flexores digitorum	Hind																															1.74	48.2	24.8043	744.129	19.1841	161.392	12	26.5	13.9	14
61	FDSH	Flexor digitorum superficialis (Forelimb)	Hind	1.75	184.906	82.8054	2484.16	12.4026	12.2628	23	38.4	412	79	0	0	0	0	0	0	0	0	336	74	2.002	11.1	5.15558	154.668	26.5517	36.6658	14.7	22	15.2	16.8
62	FDPH	Flexor digitorum profundus (Forelimb)	Hind	3.55	1284.91	281.284	8438.53	25.1595	41.656	25	39	265	47	2.66667	999	317.838	9535.14	11.9958	44.9992	32	32	144.2	29	1.848	42.6	20.5959	617.877	24.5093	146.475	13.8	26.8	15.1	12.4
63	Fib 1	Fibularis 1 (homologies unclear)	Hind	3.4	145.283	35.425	1062.75	24.0964	5.24617	18	34	22	23.5											1.9	10.1887	5.34275	160.282	25.1989	37.9969	8.3	5.33	0.4 | 0.8	1.0 | 8.0
64	Fib 2	Fibularis 2 (homologies unclear)	Hind	4.2	35.8491	7.67165	230.149	29.7661	1.13611	15.5	26	2	10.5											3.26	6.22642	1.87049	56.1146	43.2361	13.3026	9.7	11.6667	1.2 | 0.4 (*2)	12.0 | 4.0 (*2)
